# Supplementary material
Source: PubMed Central journal article supplement (PMC4381756)

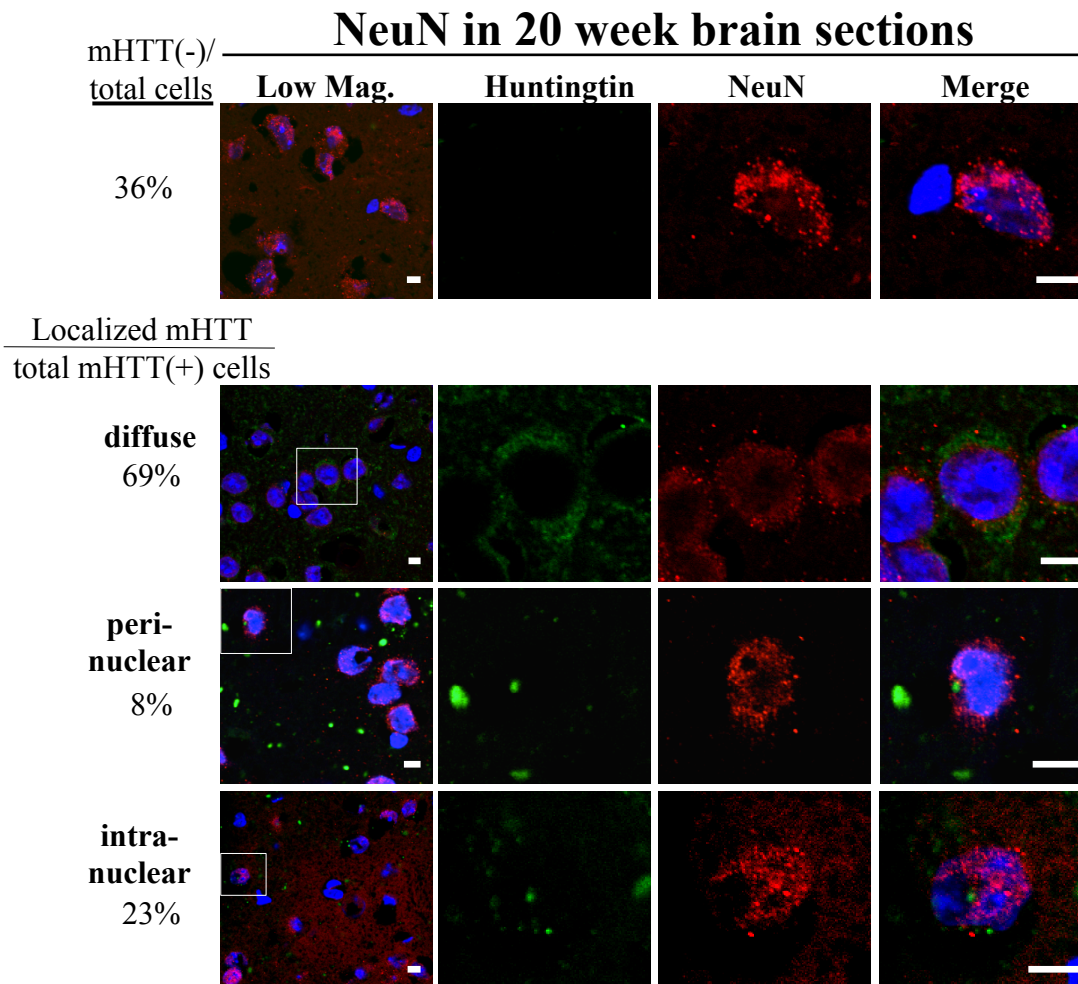

**Table S1A – NeuN; mHTT at 20, 28 and 36 weeks**

| Age<br>(weeks) | Total<br>cells | HTT(-)  |         | HTT(+)  |                          |                           |
|----------------|----------------|---------|---------|---------|--------------------------|---------------------------|
|                |                | NeuN(+) | NeuN(-) | Diffuse | Perinuclear<br>inclusion | Intranuclear<br>inclusion |
| 20             | 2211           | NeuN(+) | 778     | 957     | 96                       | 297                       |
|                |                | NeuN(-) | 22      | 18      | 19                       | 24                        |
|                |                | %       |         | 69%     | 8%                       | 23%                       |
| 28             | 1838           | NeuN(+) | 341     | 528     | 50                       | 811                       |
|                |                | NeuN(-) | 53      | 11      | 8                        | 36                        |
|                |                | %       |         | 37%     | 4%                       | 59%                       |
| 36             | 1518           | NeuN(+) | 127     | 174     | 0                        | 1107                      |
|                |                | NeuN(-) | 58      | 6       | 0                        | 46                        |
|                |                | %       |         | 14%     | 0%                       | 86%                       |

**DARPP32 in 20 week brain sections**

mHT (-)/  
total cells

**Low Mag.**

**Huntingtin**

**DARPP32**

**Merge**

38%

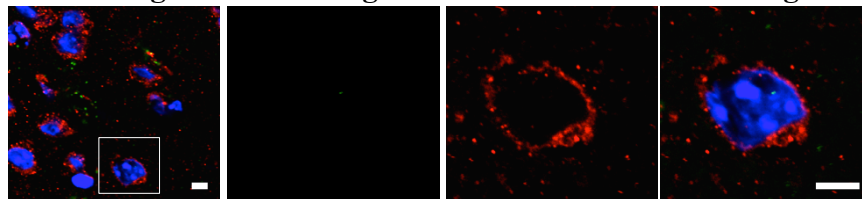

Localized mHTT  
total mHTT(+)  
cells

**diffuse**  
67%

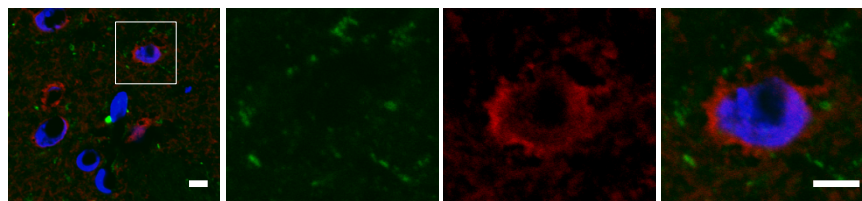

**peri-  
nuclear**  
9%

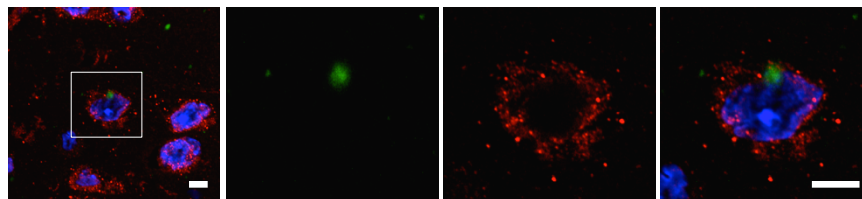

**intra-  
nuclear**  
24%

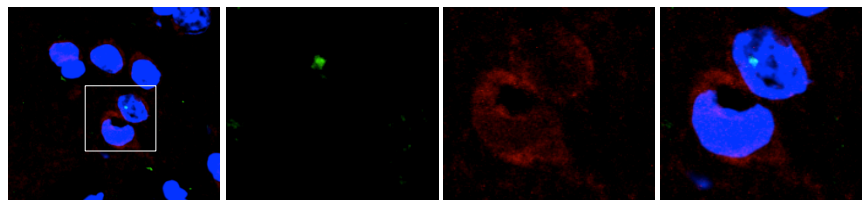

**Table S1B - DARPP32; mHTT at 20, 28 and 36 weeks**

| Age<br>(weeks) | Total<br>cells | HTT(-)     |     | HTT(+)  |                          |                           |
|----------------|----------------|------------|-----|---------|--------------------------|---------------------------|
|                |                |            |     | Diffuse | Perinuclear<br>inclusion | Intranuclear<br>inclusion |
| 20             | 2222           | DARPP32(+) | 802 | 898     | 88                       | 284                       |
|                |                | DARPP32(-) | 38  | 28      | 35                       | 49                        |
|                |                | %          |     | 67%     | 9%                       | 24%                       |
| 28             | 1842           | DARPP32(+) | 412 | 447     | 52                       | 784                       |
|                |                | DARPP32(-) | 42  | 23      | 19                       | 63                        |
|                |                | %          |     | 34%     | 5%                       | 61%                       |
| 36             | 1509           | DARPP32(+) | 164 | 158     | 0                        | 1053                      |
|                |                | DARPP32(-) | 37  | 14      | 0                        | 83                        |
|                |                | %          |     | 13%     | 0%                       | 87%                       |

**GFAP in 20 week brain sections**

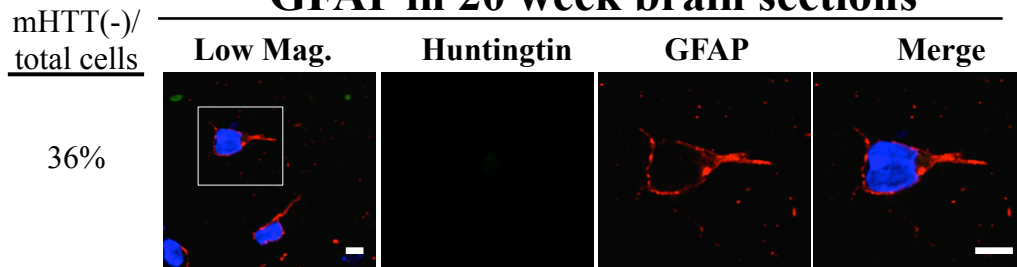

Localized mHTT  
total mHTT(+) cells

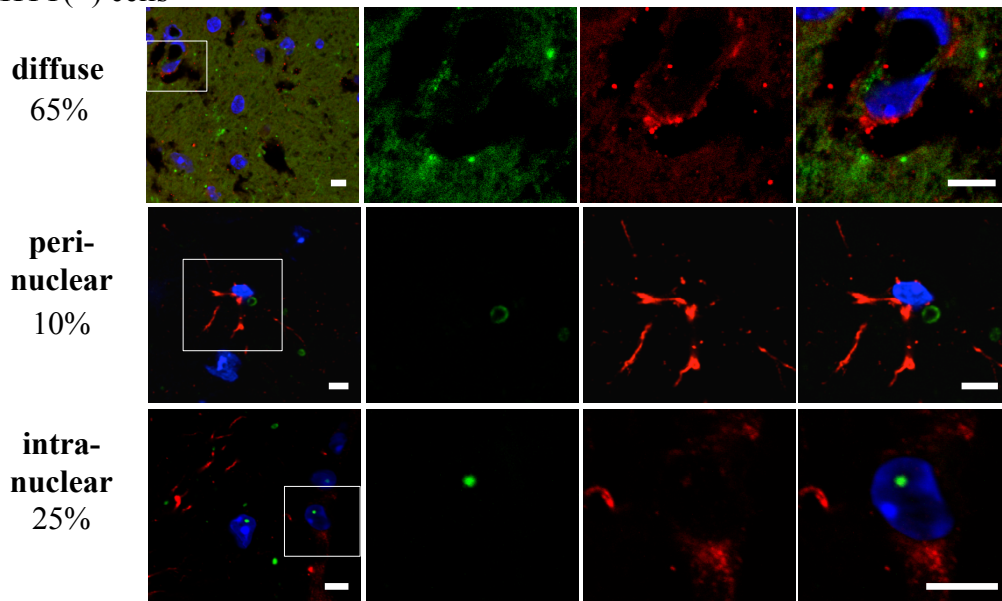

**Table S1C – GFAP; mHTT at 20, 28 and 36 weeks**

| Age (weeks) | Total cells | HTT(-)  |         | HTT(+)  |                       |                        |
|-------------|-------------|---------|---------|---------|-----------------------|------------------------|
|             |             | GFAP(+) | GFAP(-) | Diffuse | Perinuclear inclusion | Intranuclear inclusion |
| 20          | 2208        | GFAP(+) | 7       | 5       | 10                    | 2                      |
|             |             | GFAP(-) | 796     | 908     | 127                   | 353                    |
|             |             | %       |         | 65%     | 10%                   | 25%                    |
| 28          | 1853        | GFAP(+) | 14      | 9       | 8                     | 7                      |
|             |             | GFAP(-) | 363     | 486     | 70                    | 896                    |
|             |             | %       |         | 34%     | 5%                    | 61%                    |
| 36          | 1495        | GFAP(+) | 18      | 12      | 0                     | 14                     |
|             |             | GFAP(-) | 115     | 111     | 0                     | 1225                   |
|             |             | %       |         | 9%      | 0%                    | 91%                    |

**ChAT in 20 week brain sections**

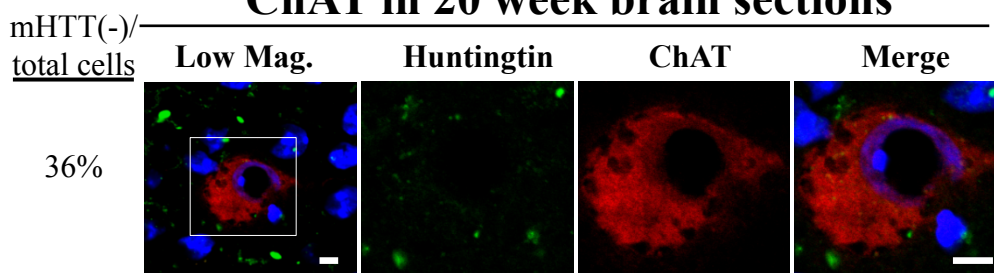

Localized mHTT  
total mHTT(+) cells

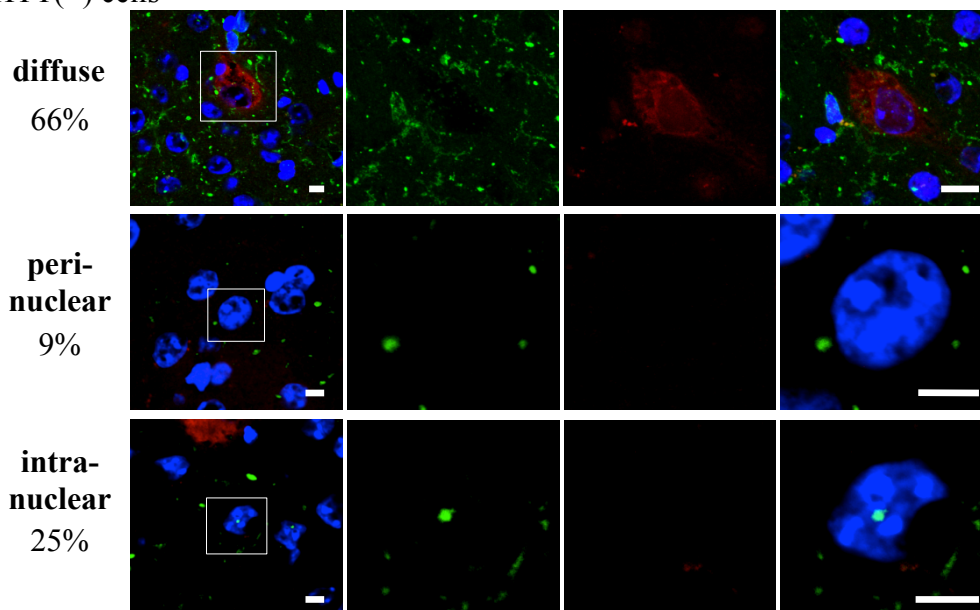

**Table S1D – ChAT; mHTT at 20, 28 and 36 weeks**

| Age (weeks) | Total cells | HTT(-)  |         | HTT(+)  |                       |                        |
|-------------|-------------|---------|---------|---------|-----------------------|------------------------|
|             |             | ChAT(+) | ChAT(-) | Diffuse | Perinuclear inclusion | Intranuclear inclusion |
| 20          | 2206        | ChAT(+) | 21      | 30      | 0                     | 0                      |
|             |             | ChAT(-) | 779     | 899     | 119                   | 358                    |
|             |             | %       |         | 66%     | 9%                    | 25%                    |
| 28          | 1840        | ChAT(+) | 24      | 16      | 0                     | 0                      |
|             |             | ChAT(-) | 358     | 455     | 79                    | 908                    |
|             |             | %       |         | 32%     | 5%                    | 62%                    |
| 36          | 1507        | ChAT(+) | 28      | 14      | 0                     | 0                      |
|             |             | ChAT(-) | 119     | 126     | 0                     | 1230                   |
|             |             | %       |         | 10%     | 0%                    | 90%                    |

## ST14A (48hr)

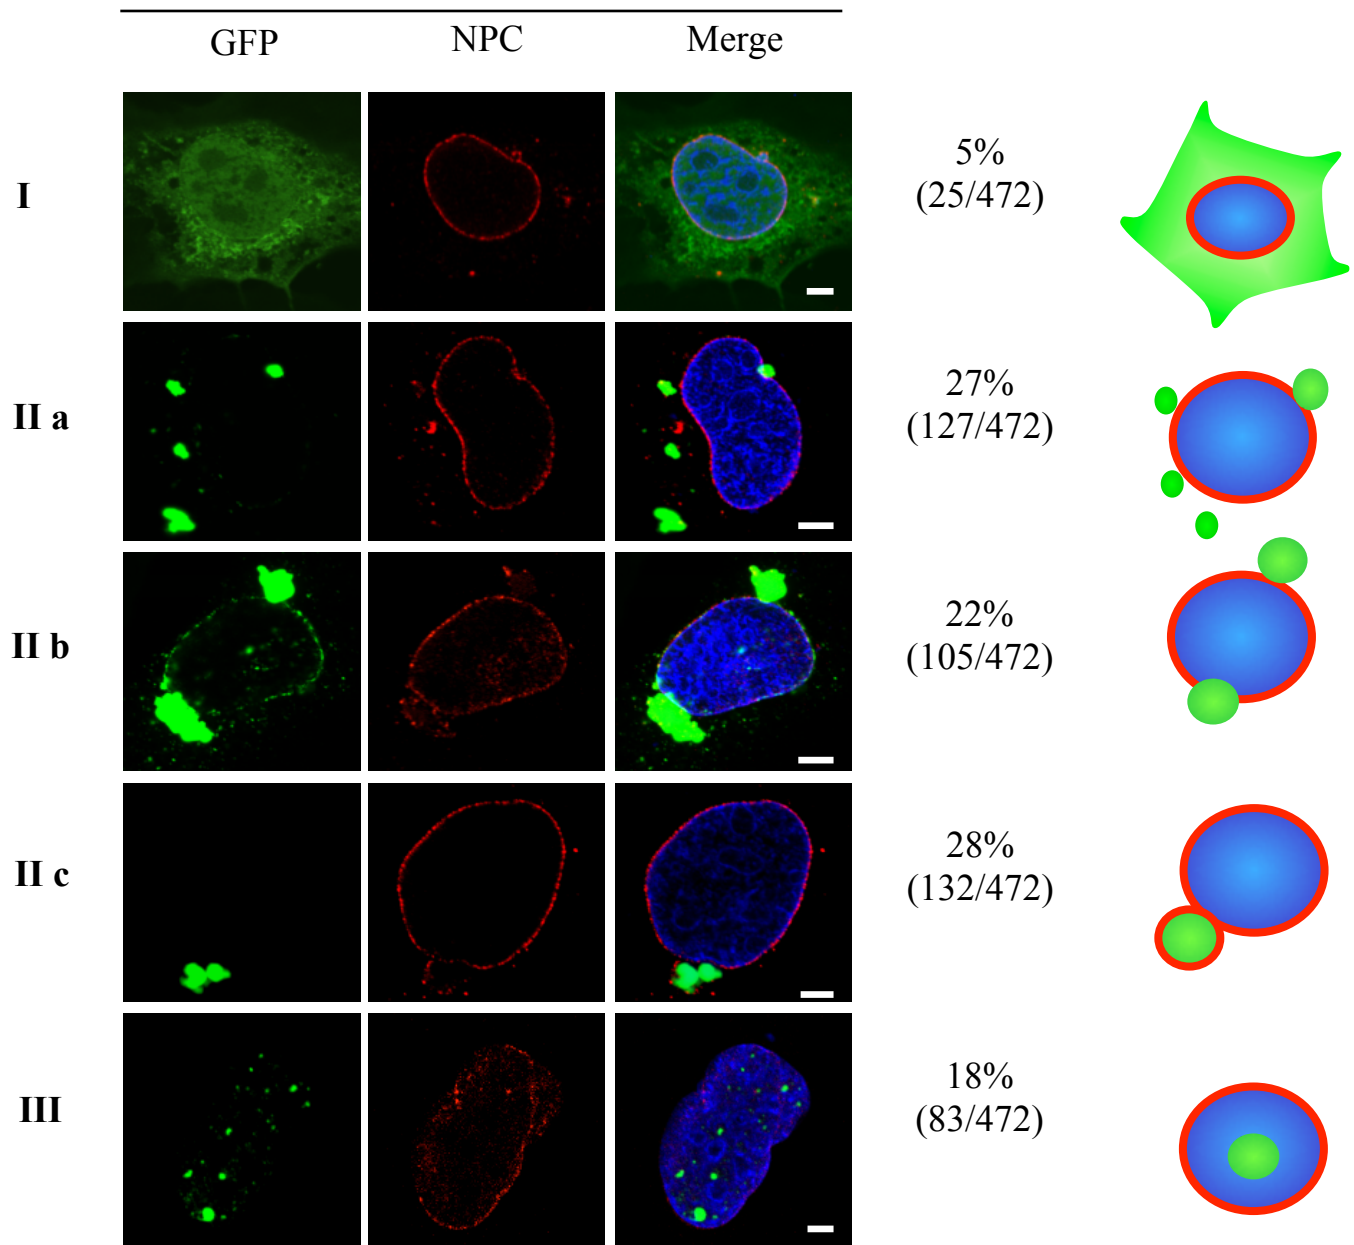

**293T (48hr)**

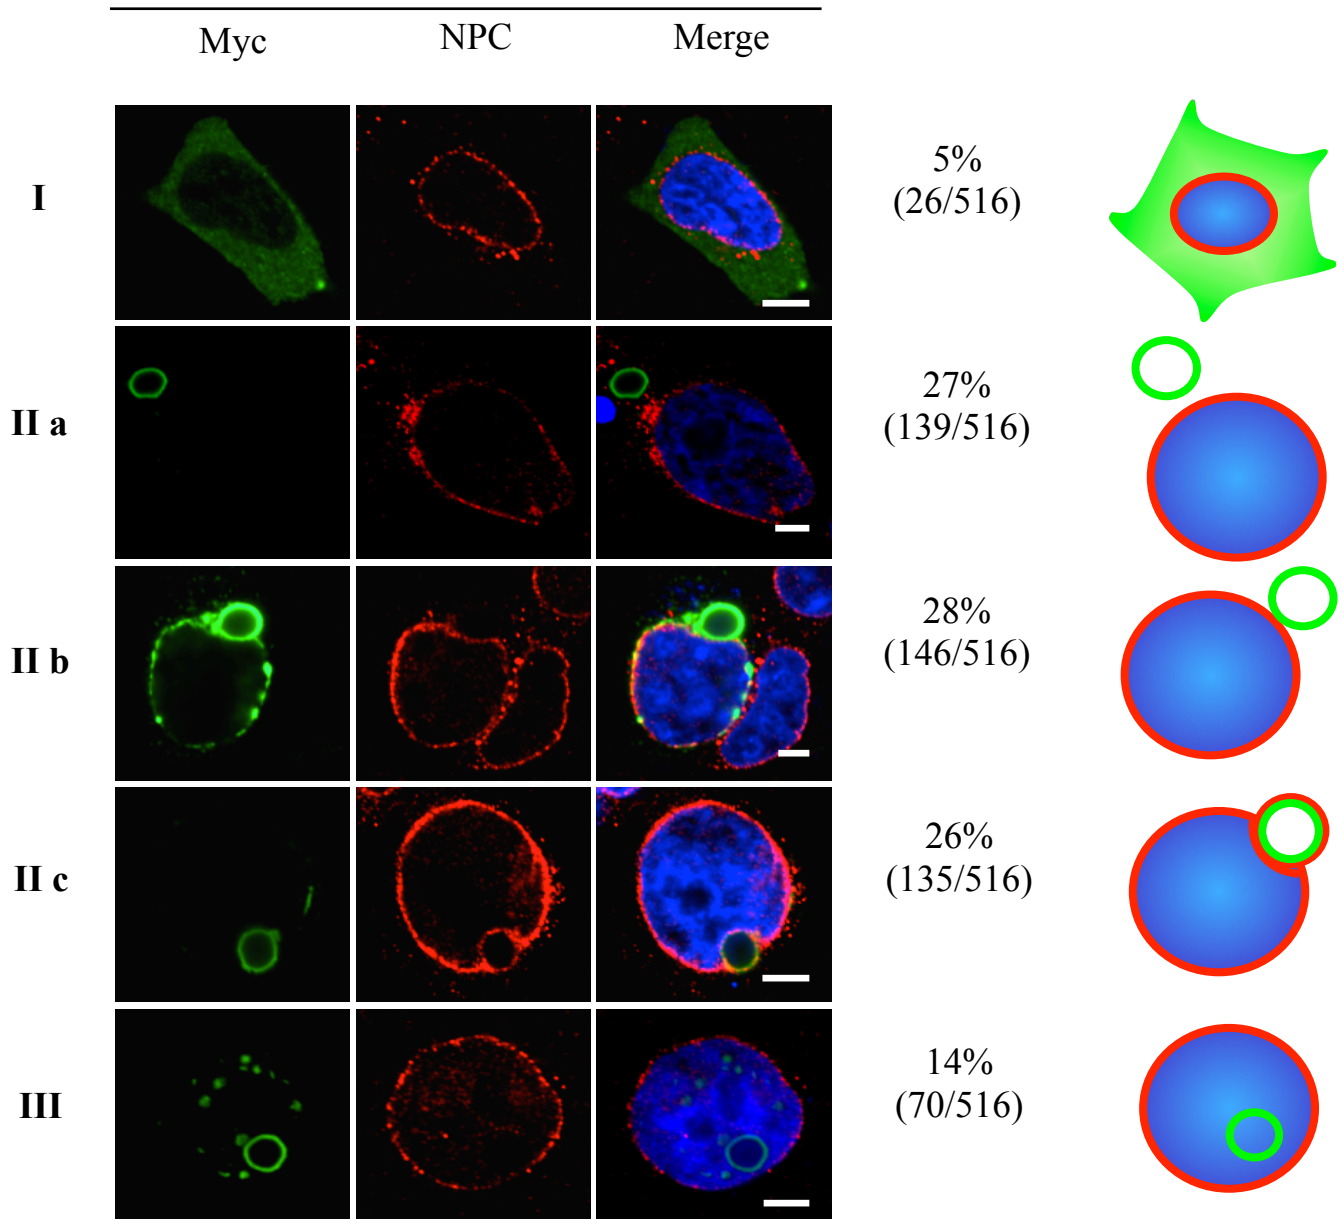

Supplement: supp_ddu574_ddu574supp_data.pdf [file supp_ddu574_ddu574supp_data.pdf]
